# Supplementary material for: Endosome and Lysosome Membrane Properties Functionally Link to γ-Secretase in Live/Intact Cells
Source: MDPI journal article supplement (doi:10.3390/s23052651), 2023-02-28
Supplement: s1 [file s1]

## Supplemental Figure S1

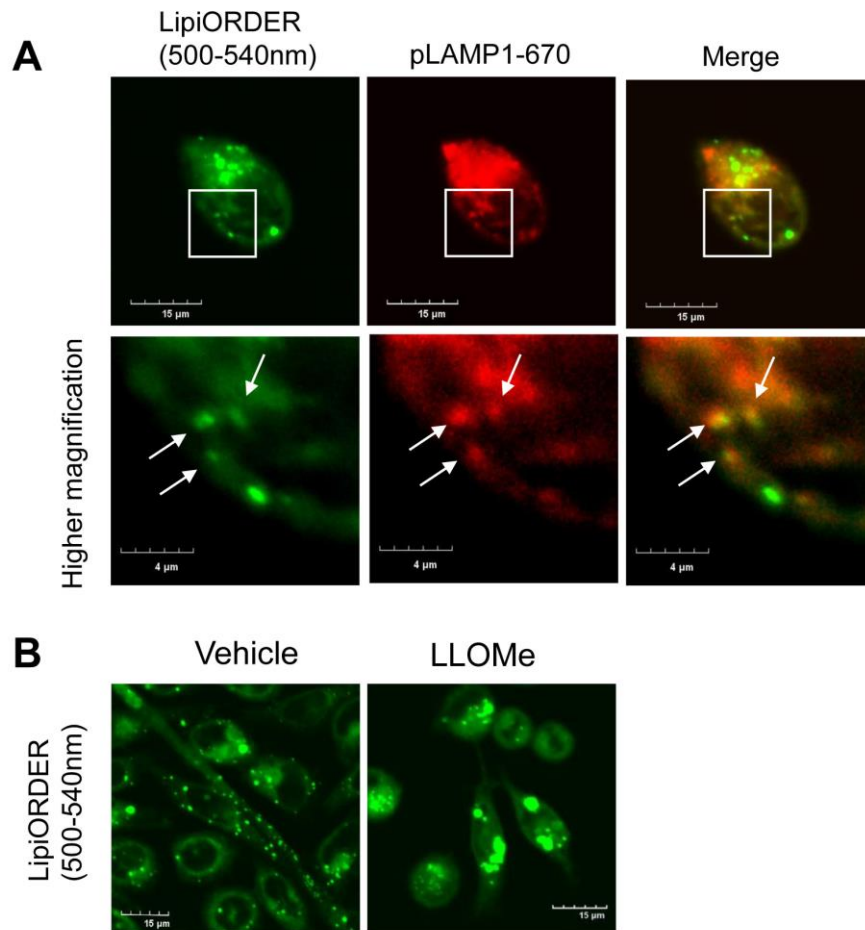

Lysosomes are labeled by LipiORDER<sup>TM</sup>: **(A)** CHO cells were transfected with pLAMP1 670, a lysosome marker, followed by staining with LipiORDER<sup>TM</sup>, a polarity sensitive solvatochromic dye. Then, the cells were excited by 405 nm and 640 nm lasers, and the emitted fluorescence within the 500-540 nm (LipiORDER<sup>TM</sup>) and 660-690 nm (LAMP1 670) was detected. Scale bar 15  $\mu$ m. Lower panels show high magnification images corresponding to the squares in the upper panels. Scale bar 4  $\mu$ m. **(B)** CHO cells were treated with either 100  $\mu$ M L-Leucyl-L-Leucine methyl ester (LLOMe) or vehicle control for 30 minutes, followed by staining with LipiORDER<sup>TM</sup>. LLOMe treatment significantly increased the size of LipiORDER<sup>TM</sup> positive puncta. Scale bar 15  $\mu$ m.

## Supplemental Figure S2

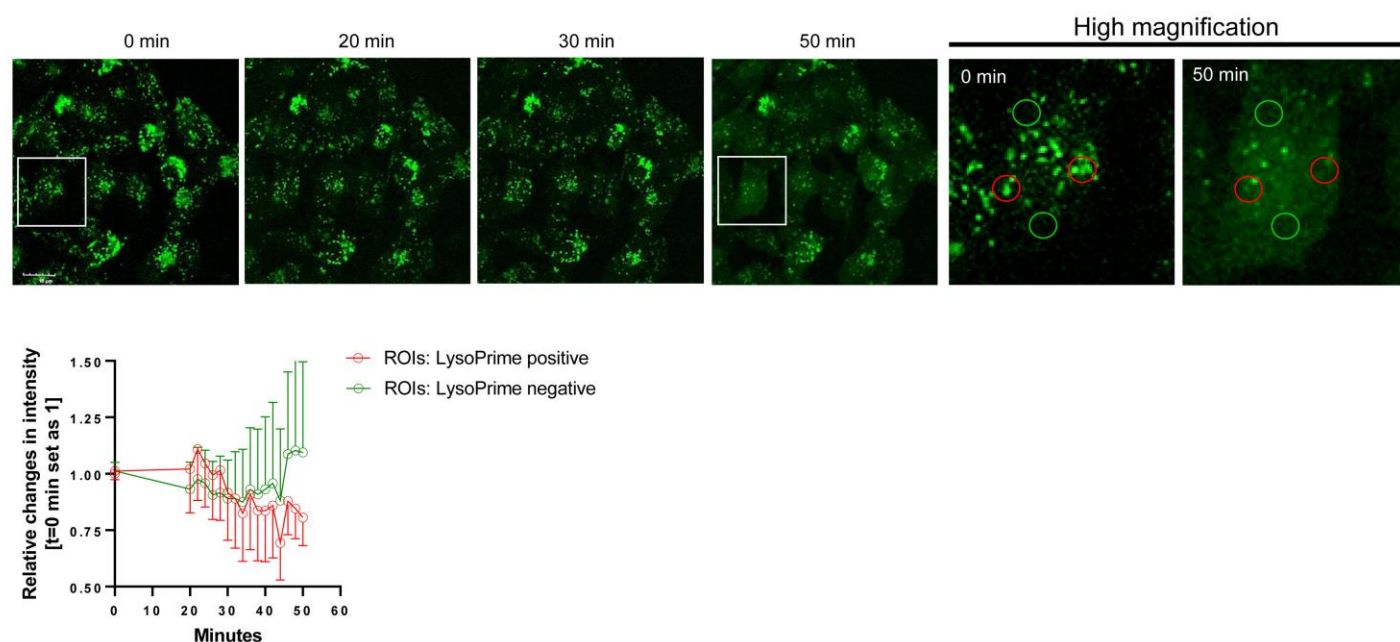

HNE-induced rupture of endosomes and lysosomes in CHO cells: CHO cells were pre-incubated with LysoPrime Green<sup>TM</sup> to label endosomes and lysosomes. Then, the cells were treated with 300  $\mu\text{M}$  HNE to induce the endo-lysosomal membrane permeabilization, followed by monitoring LysoPrime<sup>TM</sup> fluorescence for 50 min. Scale bar 15  $\mu\text{m}$ . ROIs were created on the LysoPrime<sup>TM</sup> positive endo-lysosomal compartments (e.g., red circles in high magnification images) and negative cytoplasmic (e.g., green circles) areas, and the relative changes in fluorescence within 500-540 nm range (time point 0 sets as 1) were quantified. N=20 ROIs.

### Supplemental Figure S3

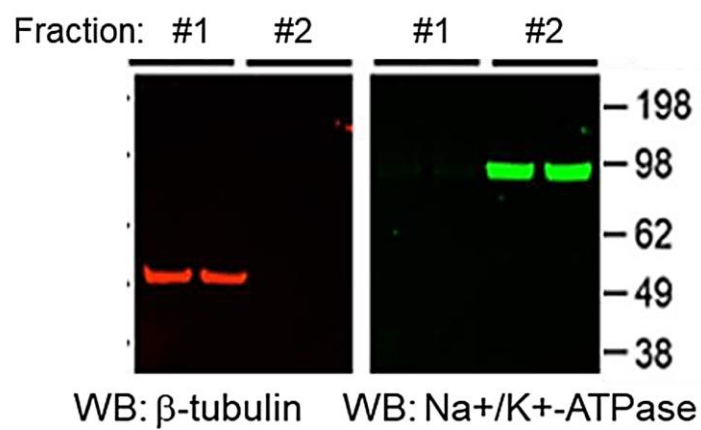

Cell fractionation using the cytoplasmic (CEB) and membrane extraction buffer (MEB): The detection of  $\beta$ -tubulin (a cytoplasmic marker) and  $\text{Na}^+/\text{K}^+-\text{ATPase}$  (a membrane marker) verifies the successful extraction of Fractions#1 and #2 in primary neurons and CHO cells.

## Supplemental Figure S4

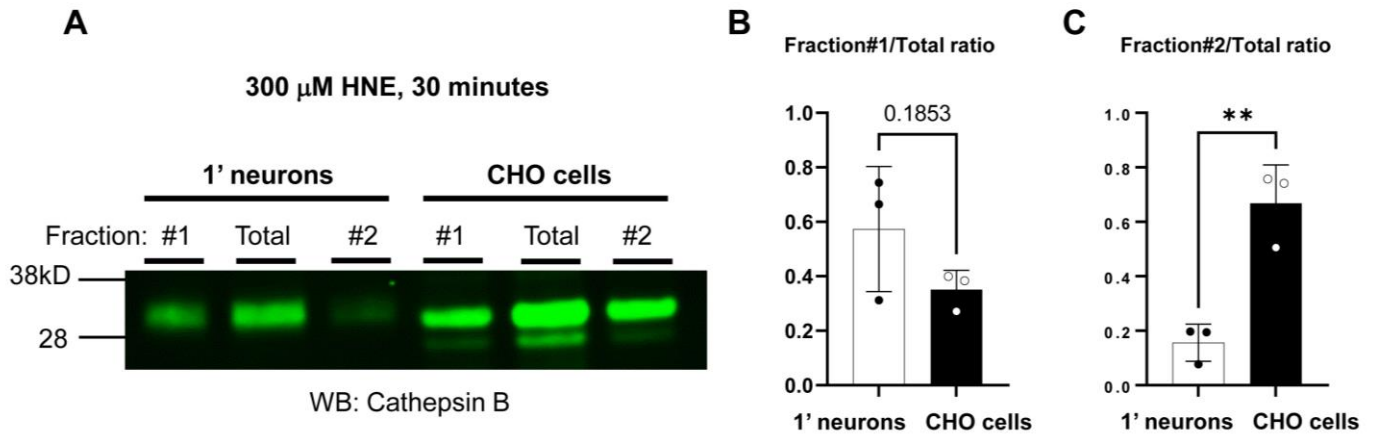

Cell fractionation post-HNE treatment: (A) Primary neurons and CHO cells were treated with 300  $\mu$ M HNE for 30 minutes, followed by subcellular fractionation. A representative Western Blot image and band quantification (B and C) indicated increased lysosomal membrane permeability in primary neurons compared to CHO cells. N=3 independent experiments, unpaired t-test, \*\*p<0.01.
